# Supplementary material for: Effects of Melanocortin 3 and 4 Receptor Deficiency on Energy Homeostasis in Rats
Source: PubMed Central journal article supplement (PMC5054679; doi:10.1038/srep34938), 2016-10-07

# **Effects of Melanocortin 3 and 4 Receptor Deficiency on Energy**

## **Homeostasis in Rats**

Panpan You, Handan Hu, Yuting Chen, Yongliang Zhao, Yiqing Yang, Tongtong Wang, Roumei Xing,  
Yanjiao Shao, Wen Zhang, Dali Li, Huaqing Chen, Mingyao Liu

### **Supplementary information**

**Supplementary Figure S1. Identification of the *Mc4r* and *Mc3r* mutations.** (a) Genotype of *Mc3r* and *Mc4r* KO rats. (b) DNA sequences of *Mc3r* and *Mc4r* genomic loci in mutants. The change in the base-pair sequence is shown at right of the sequences. (c) mRNA levels of *Mc3r* and *Mc4r* in liver, brain and WAT of WT and KO rats.

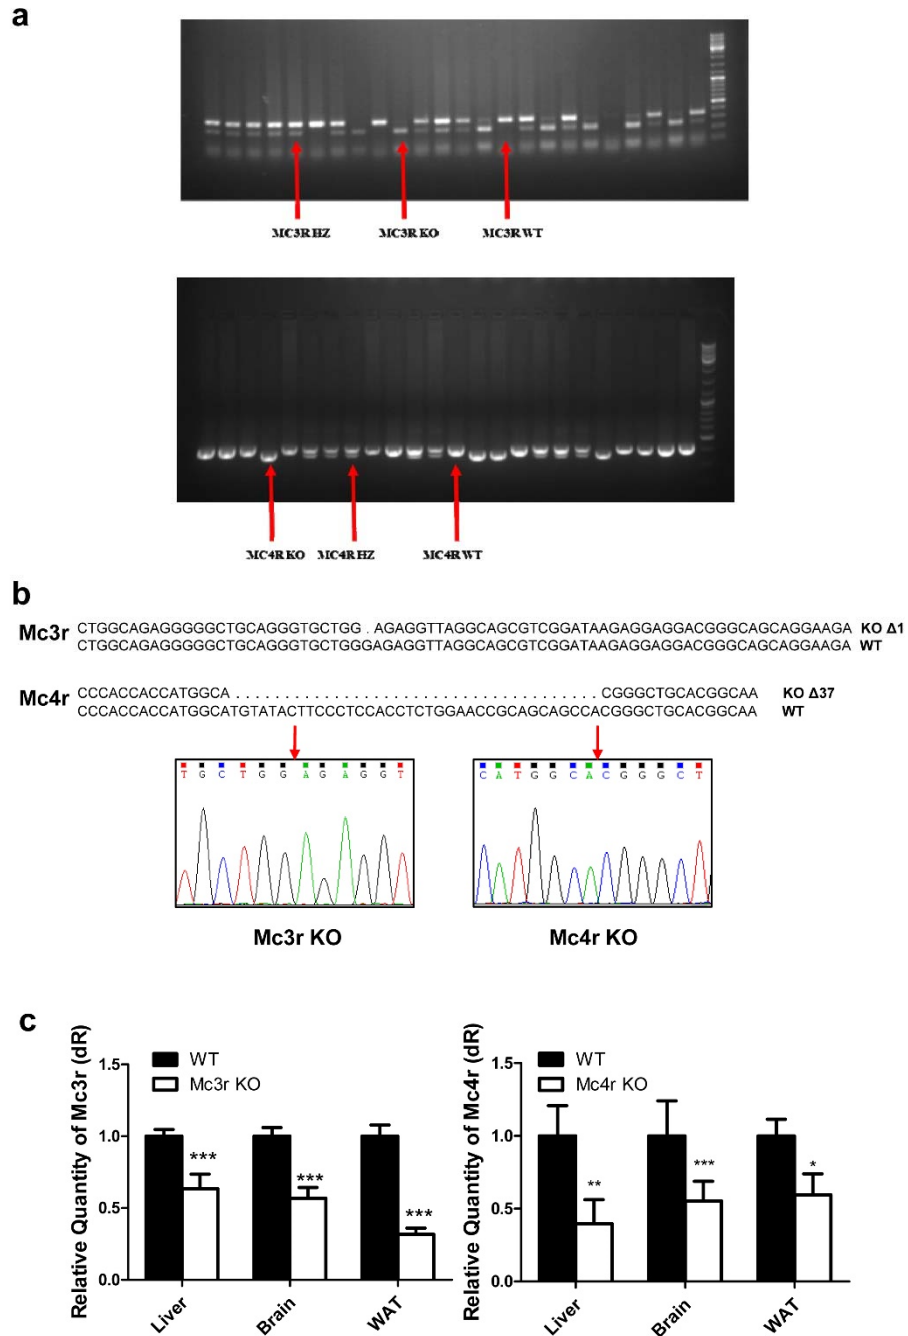

**Supplementary Figure S2. Effect of MC4R or MC3R single deficiency on body weight. (a, b)**

Body weight and (c, d) Relative body weight were measured from 4 weeks to 18 weeks for *Mc3r* KO, *Mc4r* KO and WT littermates (n = 8). Data are shown as mean ± SEM. \*\*\*p < 0.001 vs. WT control (repeated measures analysis test followed by Bonferroni post-tests).

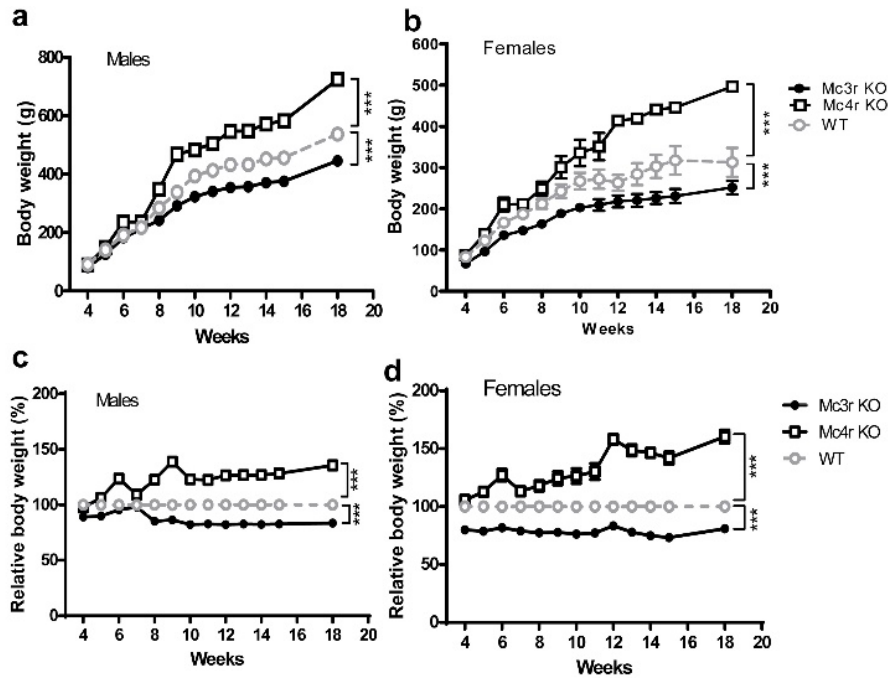

**Supplementary Figure S3. Effect of MC3R and MC4R deficiency on kidney.** Relative kidney size (vs. body length) (a), Uric acid (b) and Creatinine (c) were measured at 14 weeks of age. Data are shown as mean  $\pm$  SEM (n = 4-8). \*\*p < 0.01, \*\*\*p < 0.001 vs. WT control (one-way ANOVA test). (d) Representative image of kidney from at least 3 animals of different groups (magnification  $\times$ 100 or  $\times$  400).

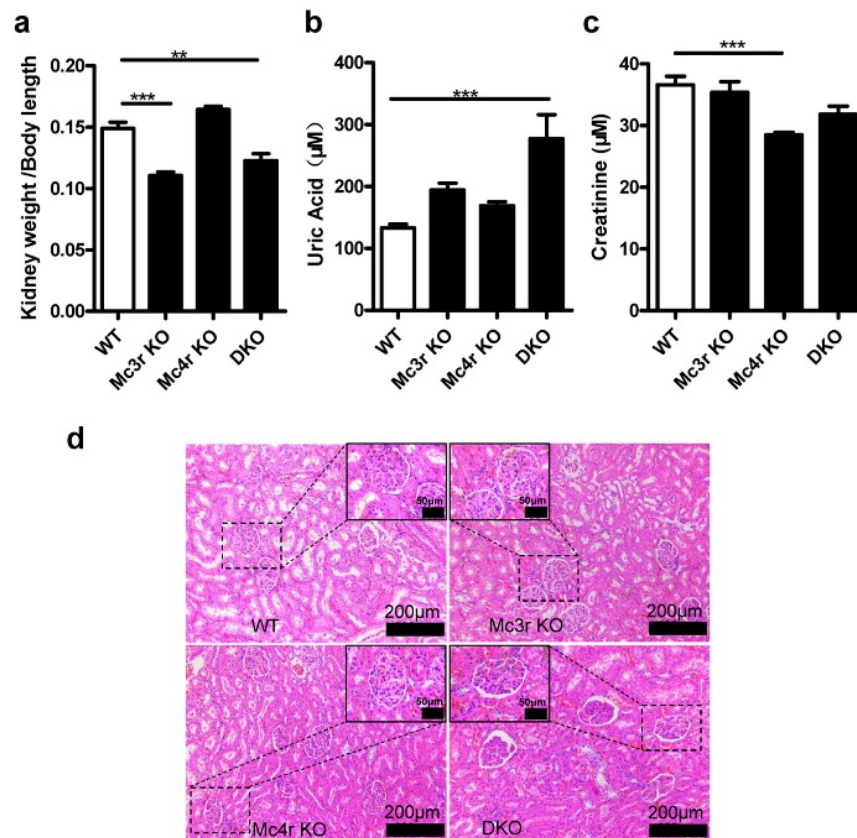

Supplement: srep34938-s1.pdf [file srep34938-s1.pdf]
